# Supplementary material for: Do primary nitrosamines form and exist in the gas phase? A computational study of CH3NHNO and (CH3)2NNO
Source: Royal Society of Chemistry journal article supplement (doi:10.1039/c2cp42219k), 2012-01-01
Supplement: c2cp42219k.pdf [file c2cp42219k.pdf]

Do primary nitrosamines form and exist in the gas phase? A computational study of  
 $\text{CH}_3\text{NHNO}$  and  $(\text{CH}_3)_2\text{NNO}$ .

**Electronic Supplementary Information**

*Yizhen Tang,<sup>\*1,2</sup> Michael Hanrath,<sup>3</sup> Claus Jørgen Nielsen<sup>2\*</sup>*

<sup>1</sup>School of Environmental and municipal engineering, Qingdao Technological University, Fushun  
Road 11. Qingdao, Shandong, 266033 P.R. China.

<sup>2</sup>Centre for Theoretical and Computational Chemistry, Department of Chemistry, University of  
Oslo, P.O. Box 1033 Blindern, 0315 Oslo, Norway.

<sup>3</sup>Institute for Theoretical Chemistry, Cologne University, Greinstrasse 4, 50939 Cologne,  
Germany.

**Figure S1.** The optimized geometries at the B3LYP/6-311++G(d,p), B3LYP/aug-cc-pVDZ, MP2/6-311++G(d,p), and MP2/aug-cc-pVDZ levels for the  $(\text{CH}_3)_2\text{N} + \text{NO}$  reaction. Bond distances are in angstrom and bond angles are in degrees. For SP3, the values are from the B3LYP/6-311++G(d,p) and B3LYP/aug-cc-pVDZ levels.

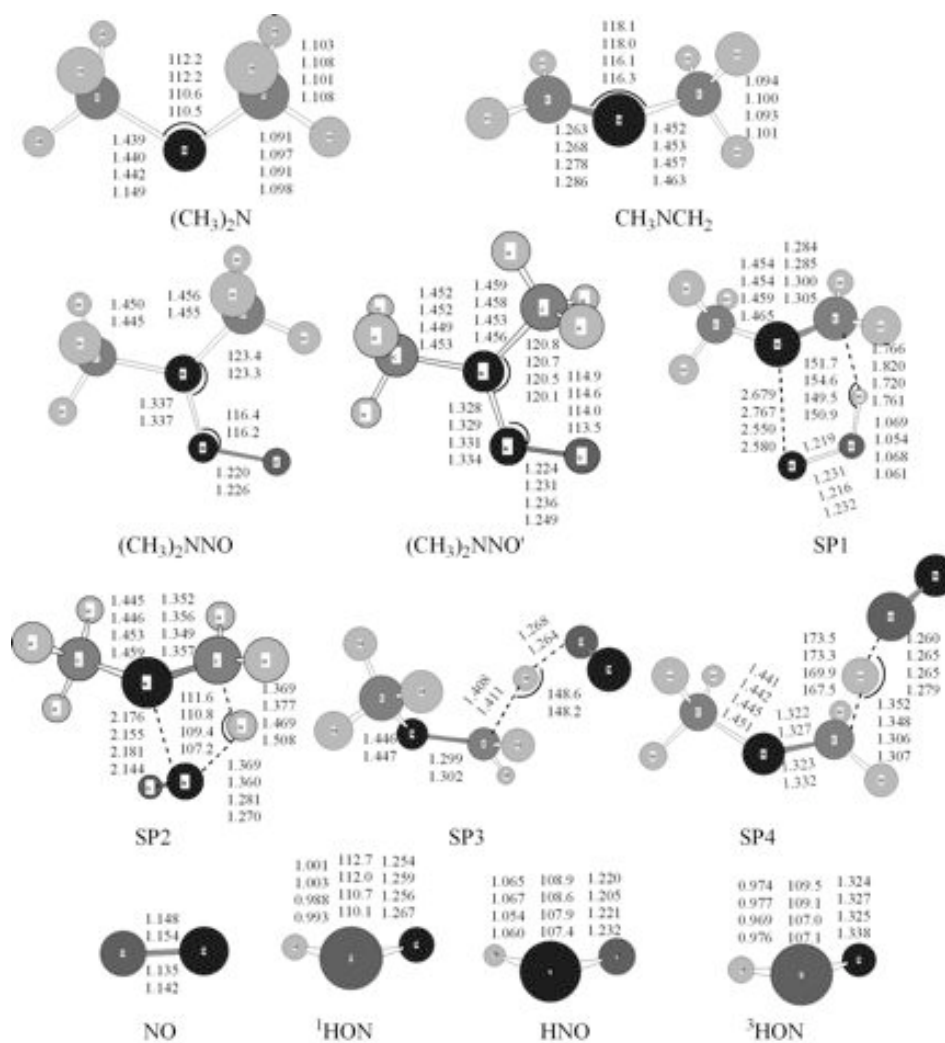

**Figure S2.** The optimized geometries at the B3LYP/6-311++G(d,p), B3LYP/aug-cc-pVDZ, MP2/6-311++G(d,p), and MP2/aug-cc-pVDZ levels for the CH<sub>3</sub>NH+NO reaction. Bond distances are in angstrom and bond angles are in degrees. For SP8 the values are from the B3LYP/6-311++G(d,p) and B3LYP/aug-cc-pVDZ levels.

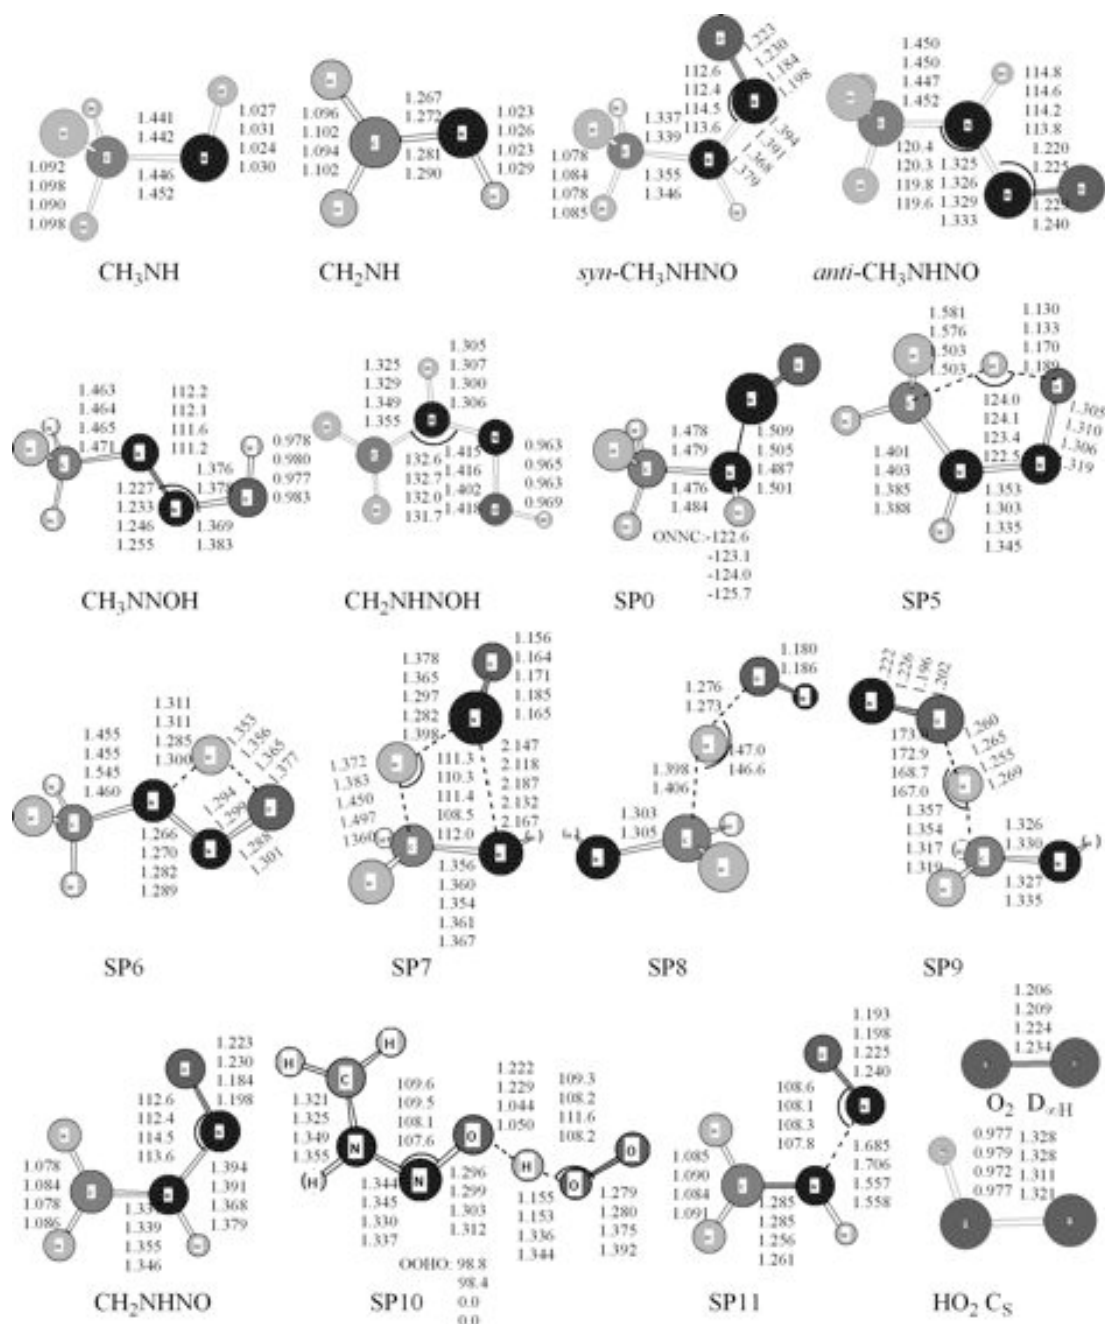

**Table S1.** The relative energies ( $\Delta E_{\text{elec}}$ , including ZPE) and enthalpies ( $\Delta H_{298}$ ) at 298 K ( $\text{kJ mol}^{-1}$ ) for the  $(\text{CH}_3)_2\text{N} + \text{NO}$  reaction system at the various levels.

| Species                                | B3LYP/6-311++G(d,p)      |                  | B3LYP/aug-cc-pVDZ        |                  | MP2/6-311++G(d,p)        |                  | MP2/aug-cc-pVDZ          |                  | G4                       |                  |
|----------------------------------------|--------------------------|------------------|--------------------------|------------------|--------------------------|------------------|--------------------------|------------------|--------------------------|------------------|
|                                        | $\Delta E_{\text{elec}}$ | $\Delta H_{298}$ |
| $(\text{CH}_3)_2\text{N}+\text{NO}$    | 0                        | 0                | 0                        | 0                | 0                        | 0                | 0                        | 0                | 0                        | 0                |
| $\text{HNO}+\text{CH}_3\text{NCH}_2$   | -41.6                    | -42.9            | -41.4                    | -42.8            | -81.7                    | -83.1            | -86.2                    | -87.5            | -61.4                    | -61.4            |
| $^1\text{HON}+\text{CH}_3\text{NCH}_2$ | 126.5                    | 125.2            | 125.4                    | 124.0            | 121.7                    | 120.4            | 116.9                    | 115.6            | 116.1                    | 116.1            |
| $^3\text{HON}+\text{CH}_3\text{NCH}_2$ | 42.7                     | 41.4             | 40.7                     | 39.3             | 31.6                     | 30.4             | 26.0                     | 24.7             | 47.7                     | 47.7             |
| $(\text{CH}_3)_2\text{NNO}$            | -169.2                   | -174.2           | -172.3                   | -177.3           |                          |                  |                          |                  | -185.3                   | -185.8           |
| $(\text{CH}_3)_2\text{NNO}'$           | -169.0                   | -174.1           | -172.4                   | -177.8           | -210.0                   | -215.1           | -220.0                   | -225.5           | -187.1                   | -187.1           |
| SP1                                    | 123.0                    | 117.8            | 120.7                    | 115.8            | 120.9                    | 115.3            | 108.2                    | 102.7            | 109.2                    | 106.7            |
| SP2                                    | 68.3                     | 62.4             | 62.6                     | 56.6             | 19.2                     | 13.4             | -1.2                     | -7.9             | 52.7                     | 50.2             |
| SP3                                    | 140.0                    | 135.8            | 135.4                    | 131.1            | 165.0                    | 162.0            | 128.5                    | 123.5            | 141.3                    | 138.9            |
| SP4                                    | 111.1                    | 108.2            | 106.8                    | 103.8            | 214.4                    | 211.4            | 204.1                    | 201.1            | 155.0                    | 152.5            |

**Table S2.** The relative energies ( $\Delta E_{\text{elec}}$ , including ZPE) and enthalpies ( $\Delta H_{298}$ ) at 298 K ( $\text{kJ mol}^{-1}$ ) for the  $\text{CH}_3\text{NH} + \text{NO}$  reaction system at the various levels.

| Species                                    | B3LYP/6-311++G(d,p)      |                  | B3LYP/aug-cc-pVDZ        |                  | MP2/6-311++G(d,p)        |                  | MP2/aug-cc-pVDZ          |                  | G4                       |                  |
|--------------------------------------------|--------------------------|------------------|--------------------------|------------------|--------------------------|------------------|--------------------------|------------------|--------------------------|------------------|
|                                            | $\Delta E_{\text{elec}}$ | $\Delta H_{298}$ |
| $\text{CH}_3\text{NH}+\text{NO}$           | 0                        | 0                | 0                        | 0                | 0                        | 0                | 0                        | 0                | 0                        | 0                |
| $\text{CH}_2\text{NH}+\text{HNO}$          | -52.7                    | -52.9            | -52.9                    | -53.1            | -89.8                    | -89.8            | -95.0                    | -95.1            | -73.3                    | -73.3            |
| $\text{CH}_2\text{NH}+\text{}^1\text{HON}$ | 115.3                    | 115.2            | 113.8                    | 113.7            | 113.7                    | 223.7            | 108.1                    | 108.0            | 104.3                    | 104.3            |
| $\text{CH}_2\text{NH}+\text{}^3\text{HON}$ | 31.5                     | 31.4             | 29.1                     | 29.0             | 23.6                     | 23.6             | 17.2                     | 17.2             | 35.9                     | 35.9             |
| <i>syn</i> - $\text{CH}_3\text{NHNO}$      | -181.9                   | -187.0           | -185.6                   | -190.8           | -213.0                   | -217.5           | -221.5                   | -226.8           | -195.6                   | -198.1           |
| <i>anti</i> - $\text{CH}_3\text{NHNO}$     | -179.1                   | -184.2           | -182.6                   | -187.7           | -207.4                   | -212.0           | -214.1                   | -219.0           | -190.1                   | -192.6           |
| $\text{CH}_3\text{NNOH}$                   | -176.3                   | -181.9           | -182.5                   | -188.2           | -214.5                   | -220.0           | -223.2                   | -228.8           | -200.1                   | -202.6           |
| $\text{CH}_2\text{NHNHOH}$                 | -60.5                    | -66.5            | -66.6                    | -72.7            | -96.5                    | -103.8           | -107.5                   | -113.1           | -79.0                    | -81.5            |
| SP0                                        | -84.8                    | -91.6            | -89.2                    | -96.0            | -125.6                   | -132.5           | -133.9                   | -140.7           | -114.0                   | -116.5           |
| SP5                                        | -5.4                     | -25.6            | -16.4                    | -24.6            | -52.3                    | -60.5            | -69.8                    | -77.9            | -25.0                    | -27.4            |
| SP6                                        | -49.8                    | -55.5            | -58.9                    | -64.7            | -88.7                    | -94.2            | -103.3                   | -108.9           | -69.0                    | -71.5            |
| SP7                                        | 58.6                     | 53.0             | 52.6                     | 47.0             | 19.6                     | 14.4             | 0.6                      | -4.8             | 47.8                     | 45.3             |
| SP8                                        | 113.8                    | 129.5            | 128.6                    | 124.3            | 141.6                    | 136.9            | 126.2                    | 121.5            | 134.1                    | 131.6            |
| SP9                                        | 111.6                    | 108.9            | 107.0                    | 104.2            | 216.2                    | 213.4            | 206.0                    | 203.1            | 155.8                    | 153.3            |

**Table S3.** The relative energies ( $\Delta E_{\text{elec}}$ , including ZPE) and enthalpies ( $\Delta H_{298}$ ) at 298 K ( $\text{kJ mol}^{-1}$ ) for the  $\text{CH}_3\text{NH} + \text{NO} + \text{O}_2$  reaction system at the various levels.

| Species                                            | B3LYP/6-311++G(d,p)      |                  | B3LYP/aug-cc-pVDZ        |                  | MP2/6-311++G(d,p)        |                  | MP2/aug-cc-pVDZ          |                  | G4                       |                  |
|----------------------------------------------------|--------------------------|------------------|--------------------------|------------------|--------------------------|------------------|--------------------------|------------------|--------------------------|------------------|
|                                                    | $\Delta E_{\text{elec}}$ | $\Delta H_{298}$ |
| $\text{CH}_3\text{NH} + \text{NO} + \text{O}_2$    | 0                        | 0                | 0                        | 0                | 0                        | 0                | 0                        | 0                | 0                        | 0                |
| $\text{CH}_2\text{NHNO} + \text{HO}_2$             | -19.3                    | -24.5            | -25.5                    | -30.8            | 45.9                     | 41.4             | 33.9                     | 28.7             | -18.4                    | -23.4            |
| $\text{CH}_2\text{NH} + \text{NO} + \text{HO}_2$   | -60.0                    | -60.1            | -58.9                    | -59.0            | -44.8                    | -44.9            | -46.7                    | -46.8            | -77.7                    | -80.2            |
| <i>syn</i> - $\text{CH}_3\text{NHNO} + \text{O}_2$ | -181.9                   | -187.0           | -185.6                   | -190.8           | -213.0                   | -217.5           | -221.5                   | -226.8           | -195.6                   | -198.1           |
| $\text{CH}_2\text{NHNHOH} + \text{O}_2$            | -65.0                    | -66.5            | -66.6                    | -72.7            | -96.5                    | -103.8           | -107.5                   | -113.1           | -79.0                    | -81.5            |
| $\text{SP5} + \text{O}_2$                          | -5.4                     | -25.6            | -16.4                    | -24.6            | -52.3                    | -60.5            | -69.8                    | -77.9            | -25.0                    | -27.4            |
| SP10                                               | 88.4                     | 80.6             | 82.4                     | 74.6             | 90.8                     | 82.9             | 77.3                     | 68.1             | 31.0                     | 26.0             |
| $\text{SP11} + \text{HO}_2$                        | -8.5                     | -13.3            | -11.2                    | -16.0            | 83.0                     | 77.5             | 66.4                     | 60.6             | -0.2                     | -5.2             |

**Table S4.** The vertical excitation energy  $T_v$  (eV) and oscillator strength  $f$  (atomic units) of the  $(\text{CH}_3)_2\text{NNO}$  at the various DFT methods with the aug-cc-pVTZ geometry.

| State | Exp. <sup>a</sup> | B3LYP |        | BP86  |        | X3LYP |        | PW1PW91 |        | PBE1PBE |        |
|-------|-------------------|-------|--------|-------|--------|-------|--------|---------|--------|---------|--------|
|       |                   | $T_v$ | $f$    | $T_v$ | $f$    | $T_v$ | $f$    | $T_v$   | $f$    | $T_v$   | $f$    |
| 1A''  | 3.41              | 3.46  | 0.0010 | 3.43  | 0.0011 | 3.46  | 0.0010 | 3.52    | 0.0011 | 3.52    | 0.0011 |
| 2A'   | 5.46              | 5.91  | 0.1413 | 5.52  | 0.1273 | 5.94  | 0.1173 | 6.08    | 0.1900 | 6.08    | 0.1913 |

<sup>a</sup>G. Geiger, H. Stafast, U. Bruehlmann and J. R. Huber, *Chemical Physics Letters*, 1981, **79**, 521-524.

**Table S5.** The vertical excitation energy (in eV) of  $(\text{CH}_3)_2\text{NNO}$  at the B3LYP/basis set//B3LYP/6-311++G(d,p) geometry.

| State | Exp. <sup>a</sup> | 6-311++G(d,p) | cc-pVDZ | cc-pVTZ | cc-pVQZ | cc-pVQZ | aug-cc-pVDZ | aug-cc-pVTZ | aug-cc-pVQZ |
|-------|-------------------|---------------|---------|---------|---------|---------|-------------|-------------|-------------|
| 1A''  | 3.41              | 3.44          | 3.46    | 3.46    | 3.45    | 3.45    | 3.45        | 3.45        | 3.44        |
| 2A'   | 5.46              | 5.91          | 6.14    | 5.99    | 5.98    | 5.88    | 5.88        | 5.87        | 5.87        |

<sup>a</sup>G. Geiger, H. Stafast, U. Bruehlmann and J. R. Huber, *Chemical Physics Letters*, 1981, **79**, 521-524.

**Table S6.** The vertical excitation energy (eV) of the  $(\text{CH}_3)_2\text{NNO}$  at the various basis sets with the B3LYP/basis set//B3LYP/basis set.

| State | Exp. <sup>a</sup> | 6-311++G(d,p) | cc-pVDZ | cc-pVTZ | cc-pVQZ | cc-pVQZ | aug-cc-pVDZ | aug-cc-pVTZ | aug-cc-pVQZ |
|-------|-------------------|---------------|---------|---------|---------|---------|-------------|-------------|-------------|
| 1A''  | 3.41              | 3.44          | 3.45    | 3.47    | 3.47    | 3.47    | 3.43        | 3.43        | 3.46        |
| 2A'   | 5.46              | 5.91          | 6.05    | 6.01    | 6.02    | 6.02    | 5.85        | 5.85        | 5.91        |

<sup>a</sup>G. Geiger, H. Stafast, U. Bruehlmann and J. R. Huber, *Chemical Physics Letters*, 1981, **79**, 521-524.

**Table S7.** The vertical excitation energy (in eV) of the  $(\text{CH}_3)_2\text{NNO}$  at the CASPT2 and MR-Cl methods with different basis set.

| State | Exp. <sup>a</sup> | cc-pVDZ |      | cc-pVTZ |      | aug-cc-pVDZ |      | aug-cc-pVTZ |      |
|-------|-------------------|---------|------|---------|------|-------------|------|-------------|------|
|       |                   | CASPT2  | MRCI | CASPT2  | MRCI | CASPT2      | MRCI | CASPT2      | MRCI |
| 1A''  | 3.41              | 4.03    | 4.09 | 3.45    | 3.47 | 3.54        | 3.36 | 3.43        | 3.43 |
| 2A'   | 5.46              | 6.25    | 6.27 | 5.55    | 6.02 | 5.45        | 5.84 | 5.46        | 5.46 |

<sup>a</sup>G. Geiger, H. Stafast, U. Bruehlmann and J. R. Huber, *Chemical Physics Letters*, 1981, **79**, 521-524.

**Table S8.** The vertical excitation energy  $T_V$  (eV) and oscillator strength  $f$  (atomic units) of the first excited state ( $1A''$ ) of the  $CH_3NHNO$ ,  $CH_3NNOH$ ,  $CH_2NHNOH$  and  $CH_3NHNO_2$  at various DFT methods with the aug-cc-pVTZ geometry.

| Species     | State  | B3LYP |        | BP86  |        | X3LYP |        | PW1PW91 |        | PBE1PBE |        |
|-------------|--------|-------|--------|-------|--------|-------|--------|---------|--------|---------|--------|
|             |        | $T_V$ | $f$    | $T_V$ | $f$    | $T_V$ | $f$    | $T_V$   | $f$    | $T_V$   | $f$    |
| $CH_3NHNO$  | $1A''$ | 3.43  | 0.0012 | 3.38  | 0.0011 | 3.44  | 0.0012 | 3.49    | 0.0013 | 3.49    | 0.0012 |
|             | $2A'$  | 5.23  | 0.0056 | 4.61  | 0.0068 | 5.25  | 0.0058 | 5.46    | 0.0056 | 5.49    | 0.0058 |
| $CH_3NNOH$  | $1A''$ | 4.70  | 0.0000 | 4.63  | 0.0000 | 4.71  | 0.0000 | 4.77    | 0.0000 | 4.78    | 0.0000 |
|             | $2A'$  | 6.47  | 0.0673 | 5.97  | 0.0604 | 6.51  | 0.0650 | 6.69    | 0.0805 | 6.69    | 0.0902 |
| $CH_2NHNOH$ | $1A''$ | 3.81  | 0.0047 | 3.77  | 0.0048 | 3.77  | 0.0048 | 3.92    | 0.0053 | 3.97    | 0.0053 |
|             | $2A''$ | 4.35  | 0.0018 | 4.25  | 0.0009 | 4.32  | 0.0019 | 4.47    | 0.0018 | 4.53    | 0.0022 |

**Table S9.** The PCM-TDDFT vertical excitation energy (eV) and oscillator strength (atomic units) of  $(CH_3)_2NNO$ ,  $CH_3NHNO$ ,  $CH_3NNOH$ , and  $CH_2NHNOH$  in various solvents at the B3LYP/aug-cc-pVTZ level.

| Species       | n-hexane          |        | ethanol           |        | methanol |        | nitromethane |        | water             |        | gas phase         |        |
|---------------|-------------------|--------|-------------------|--------|----------|--------|--------------|--------|-------------------|--------|-------------------|--------|
|               | $T_V$             | $f$    | $T_V$             | $f$    | $T_V$    | $f$    | $T_V$        | $f$    | $T_V$             | $f$    | $T_V$             | $f$    |
| $(CH_3)_2NNO$ | 3.50              | 0.0015 | 3.59              | 0.0015 | 3.5      | 0.0015 | 3.59         | 0.0015 | 3.60              | 0.0015 | 3.49              | 0.0010 |
|               | 3.53 <sup>a</sup> |        | 3.58 <sup>a</sup> |        |          |        |              |        | 3.70 <sup>b</sup> |        | 3.41 <sup>c</sup> |        |
| $CH_3NHNO$    | 3.45              | 0.0014 | 3.56              | 0.0018 | 3.56     | 0.0014 | 3.56         | 0.0015 |                   |        | 3.43              | 0.0012 |
| $CH_3NNOH$    | 4.68              | 0.0000 | 4.67              | 0.0000 | 4.67     | 0.0000 | 4.67         | 0.0000 |                   |        | 4.70              | 0.0000 |
| $CH_2NHNOH$   | 3.95              | 0.0067 | 4.10              | 0.0117 | 4.11     | 0.0118 | 4.11         | 0.0120 |                   |        | 3.81              | 0.0047 |

<sup>a</sup> From R. N. Haszeldine and J. Jander, *Journal of the Chemical Society*, **1954**, 691-695. <sup>b</sup> From M. H. Plumlee and M. Reinhard, *Environmental Science & Technology* **2007**, *41* (17), 6170-6176. <sup>c</sup> G. Geiger, H. Stafast, U. Bruehlmann and J. R. Huber, *Chemical Physics Letters*, **1981**, *79*, 521-524.
